# Supplementary material for: Growth factor supplementation modulates survival, morphology, and network activity of neurogenin-2 induced human neurons
Source: Research Square preprint supplement (doi:10.21203/rs.3.rs-7600378/v1), 2025-10-10
Supplement: Supplementary file 1 [file 1ea5649222578be596732dfe.docx]

**Supplementary figures**

**Supplementary figure 1. Absence of GFs reduces soma size, DCV- and synapse numbers**

**(A)** Soma size per condition at WIC6. (**B**) Soma size over time. N numbers of individual experiments and single neuron observations in brackets. WIC2: B/G/C: 3(31); no GF: 3(33); BDNF: 3(22); GNDF: 3(30); CNTF: 3(27); B/G/NT3: 3(19). WIC4: B/G/C: 3(29); no GF: 3(30); BDNF: 3(26); GNDF: 3(32); CNTF: 3(22); B/G/NT3: 3(22). WIC6: B/G/C: 3(27); no GF: 3(24); BDNF: 3(23); GNDF: 3(31); CNTF: 3(25); B/G/NT3: 3(20). (**C**) The number of ChgA puncta per neuron at 2, 4 and 6 WIC. **(D)** Number of ChgA puncta per μm. (**E**) ChgA intensity per neuron. (**F**) Number of Syp1 puncta per neuron. (**G**) Number of Syp1 puncta per μm. (**H**) Syp1 intensity per neuron. Line and bar plots represent the mean ± SEM. Two-way ANOVA and Kruskal-Wallis H test with Dunn’s correction: * *P* < 0.05, ** *P* < 0.01, *** P < 0.001. ns = non-significant, *P* > 0.05.

**Supplementary figure 2. Absence of GFs in culture medium dramatically affects calcium transients**

**(A)** Representative calcium traces in B/G/C- and -GF cultures. Red circles represent the peaks detected. Each grey line shows the activity of a neuron in a FOV (**B**) The number of jREGCO+ neurons per FOV. N numbers of individual experiments: B/G/C: 6(36); no GF: 4(20); BDNF: 4(21); GNDF: 4(21); CNTF: 4(21); B/G/NT3: 6(36); B/G: 6(44); B/C: 6(38); G/C: 6(37). (**C**) The mean frequency of calcium events of individual neurons in a FOV at 2, 4 and 6 WIC. (**D**) The mean frequency of network bursts in a FOV. (**E**) Percentage of neurons that are active at the same time in a given timeframe. (**E**) Percentage of inactive cells in a FOV. Line and bar plots represent the mean ± SEM. Kruskal-Wallis H test with Dunn’s correction: * *P* < 0.05, ** *P* < 0.01, *** P < 0.001. ns = non-significant, *P* > 0.05.

**Supplementary figure 3. BrainPhys medium +B27/GFs supports neuronal activity in Kolf2.1 neurons**

(**A**) Representative calcium traces in BP cultures with B/G/C +B27, and no supplements. Each grey line shows the activity of a neuron in a FOV. (**B**) The number of neurons over time in a FOV. N numbers of individual experiments with number of FOVs in brackets per timepoints: B/G/C: 2(6-8); BP + B/G/C: 2(6-8); BP: 2(5-8); BP + B/G/C +B27: 2(2-4). (**C**) The number of neurons over time in a FOV, treated with TTX. N numbers of individual experiments with number of FOVs in brackets per timepoints: B/G/C: 2(2-4); B/G/C + TTX 2(2-4); BP + B/G/C + TTX: 2(2-4); BP +TTX: 2(2-4); BP + B/G/C +B27 + TTX: 2(2-4). (**D**) The percentage of inactive Kolf2.1 neuron at WIC6. N numbers of individual experiments with number of neurons in brackets: B/G/C: 3(18); BP + B/G/C + B27: 3(18); BP + B/G/NT3 + B27: 3(18). (**E**) The mean cell frequency of Kolf2.1 neurons in a FOV at WIC6. N numbers of individual experiments with number of neurons in brackets: B/G/C: 3(18); BP + B/G/C: 3(17); BP + B/G/NT3: 3(18); BP + B/G/C + B27: 3(18); BP + B/G/NT3 + B27: 3(18). (**F**) The mean network frequency of Kolf2.1 neurons at WIC6. (**G**) Percentage of Kolf2.1 neurons that are active at the same time in a given timeframe at WIC6.
